# Supplementary material
Source: publisher figshare collection journal article supplement (https://gsapubs.figshare.com/ndownloader/files/23291780)
Supplement: Supplementary file 1 [file 23291780]

(a)

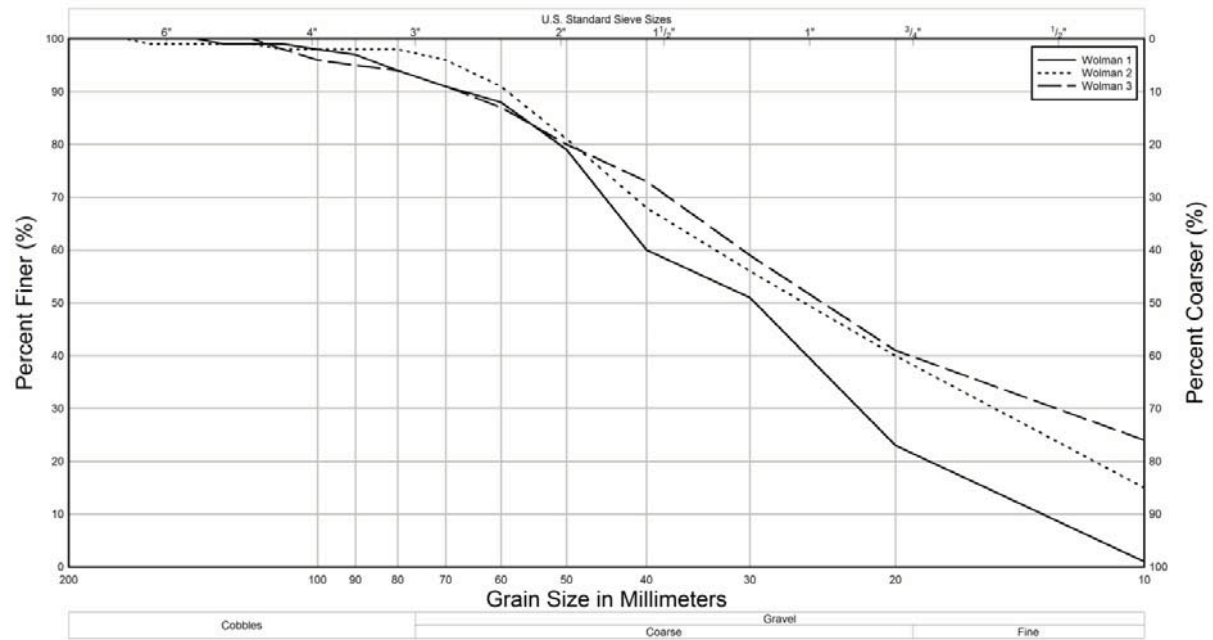

(b)

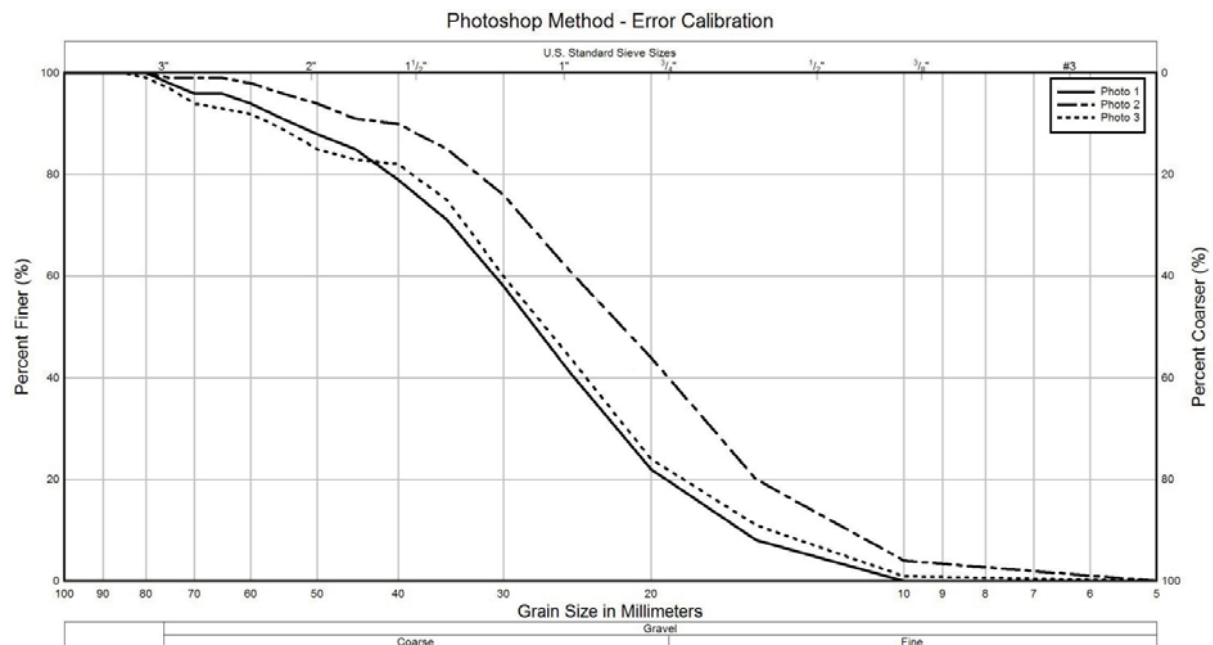

Figure A.2.

A

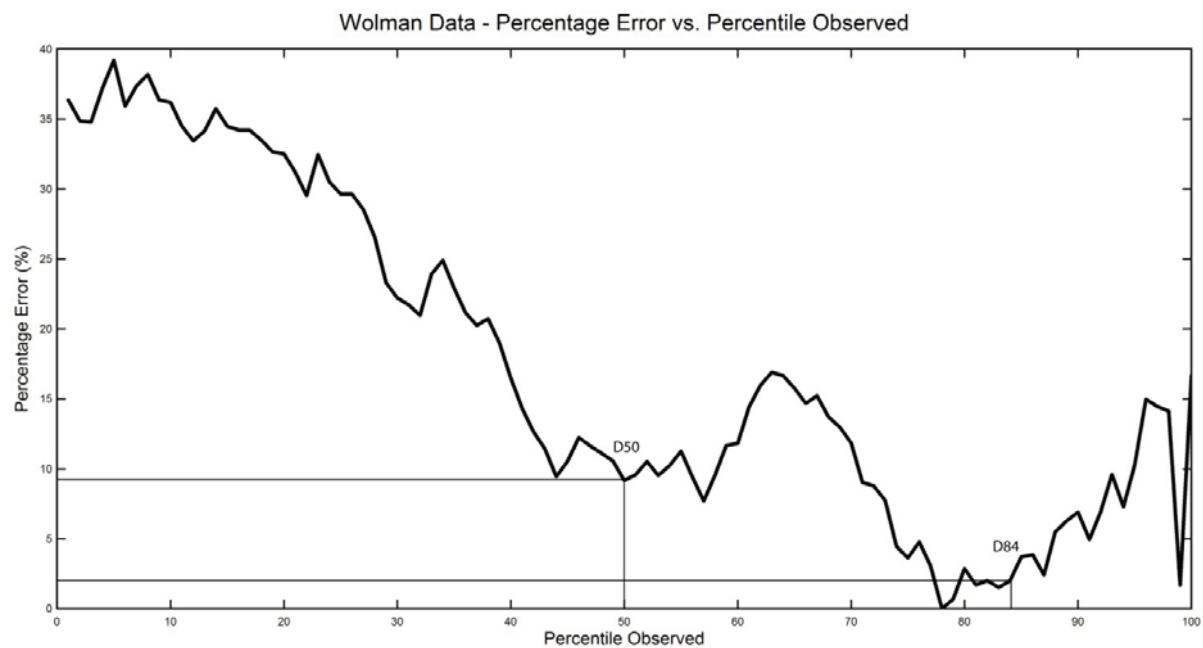

B

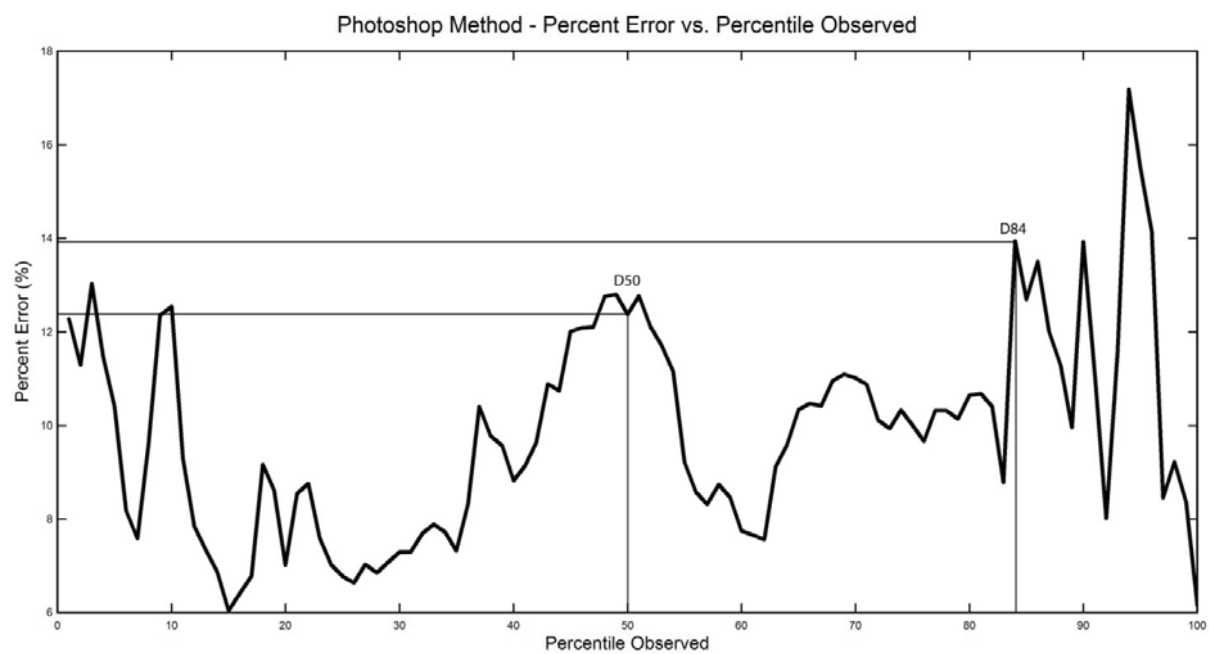

Figure A.1. Cumulative frequency curves for repeated grain size measurements on a Montsor conglomerate sample NE of La Pobra. (A) in situ Wolman point counts; (B) Photo point counts.

Figure A.2. Percentage error derived from Figure A.1., against percentile observed for (A) in situ Wolman point counts; (B) Photo point counts.
